# Supplementary material
Source: bioRxiv or medRxiv preprint supplement (https://www.medrxiv.org/highwire/filestream/68145/field_highwire_adjunct_files/2/19000430-3.pdf)

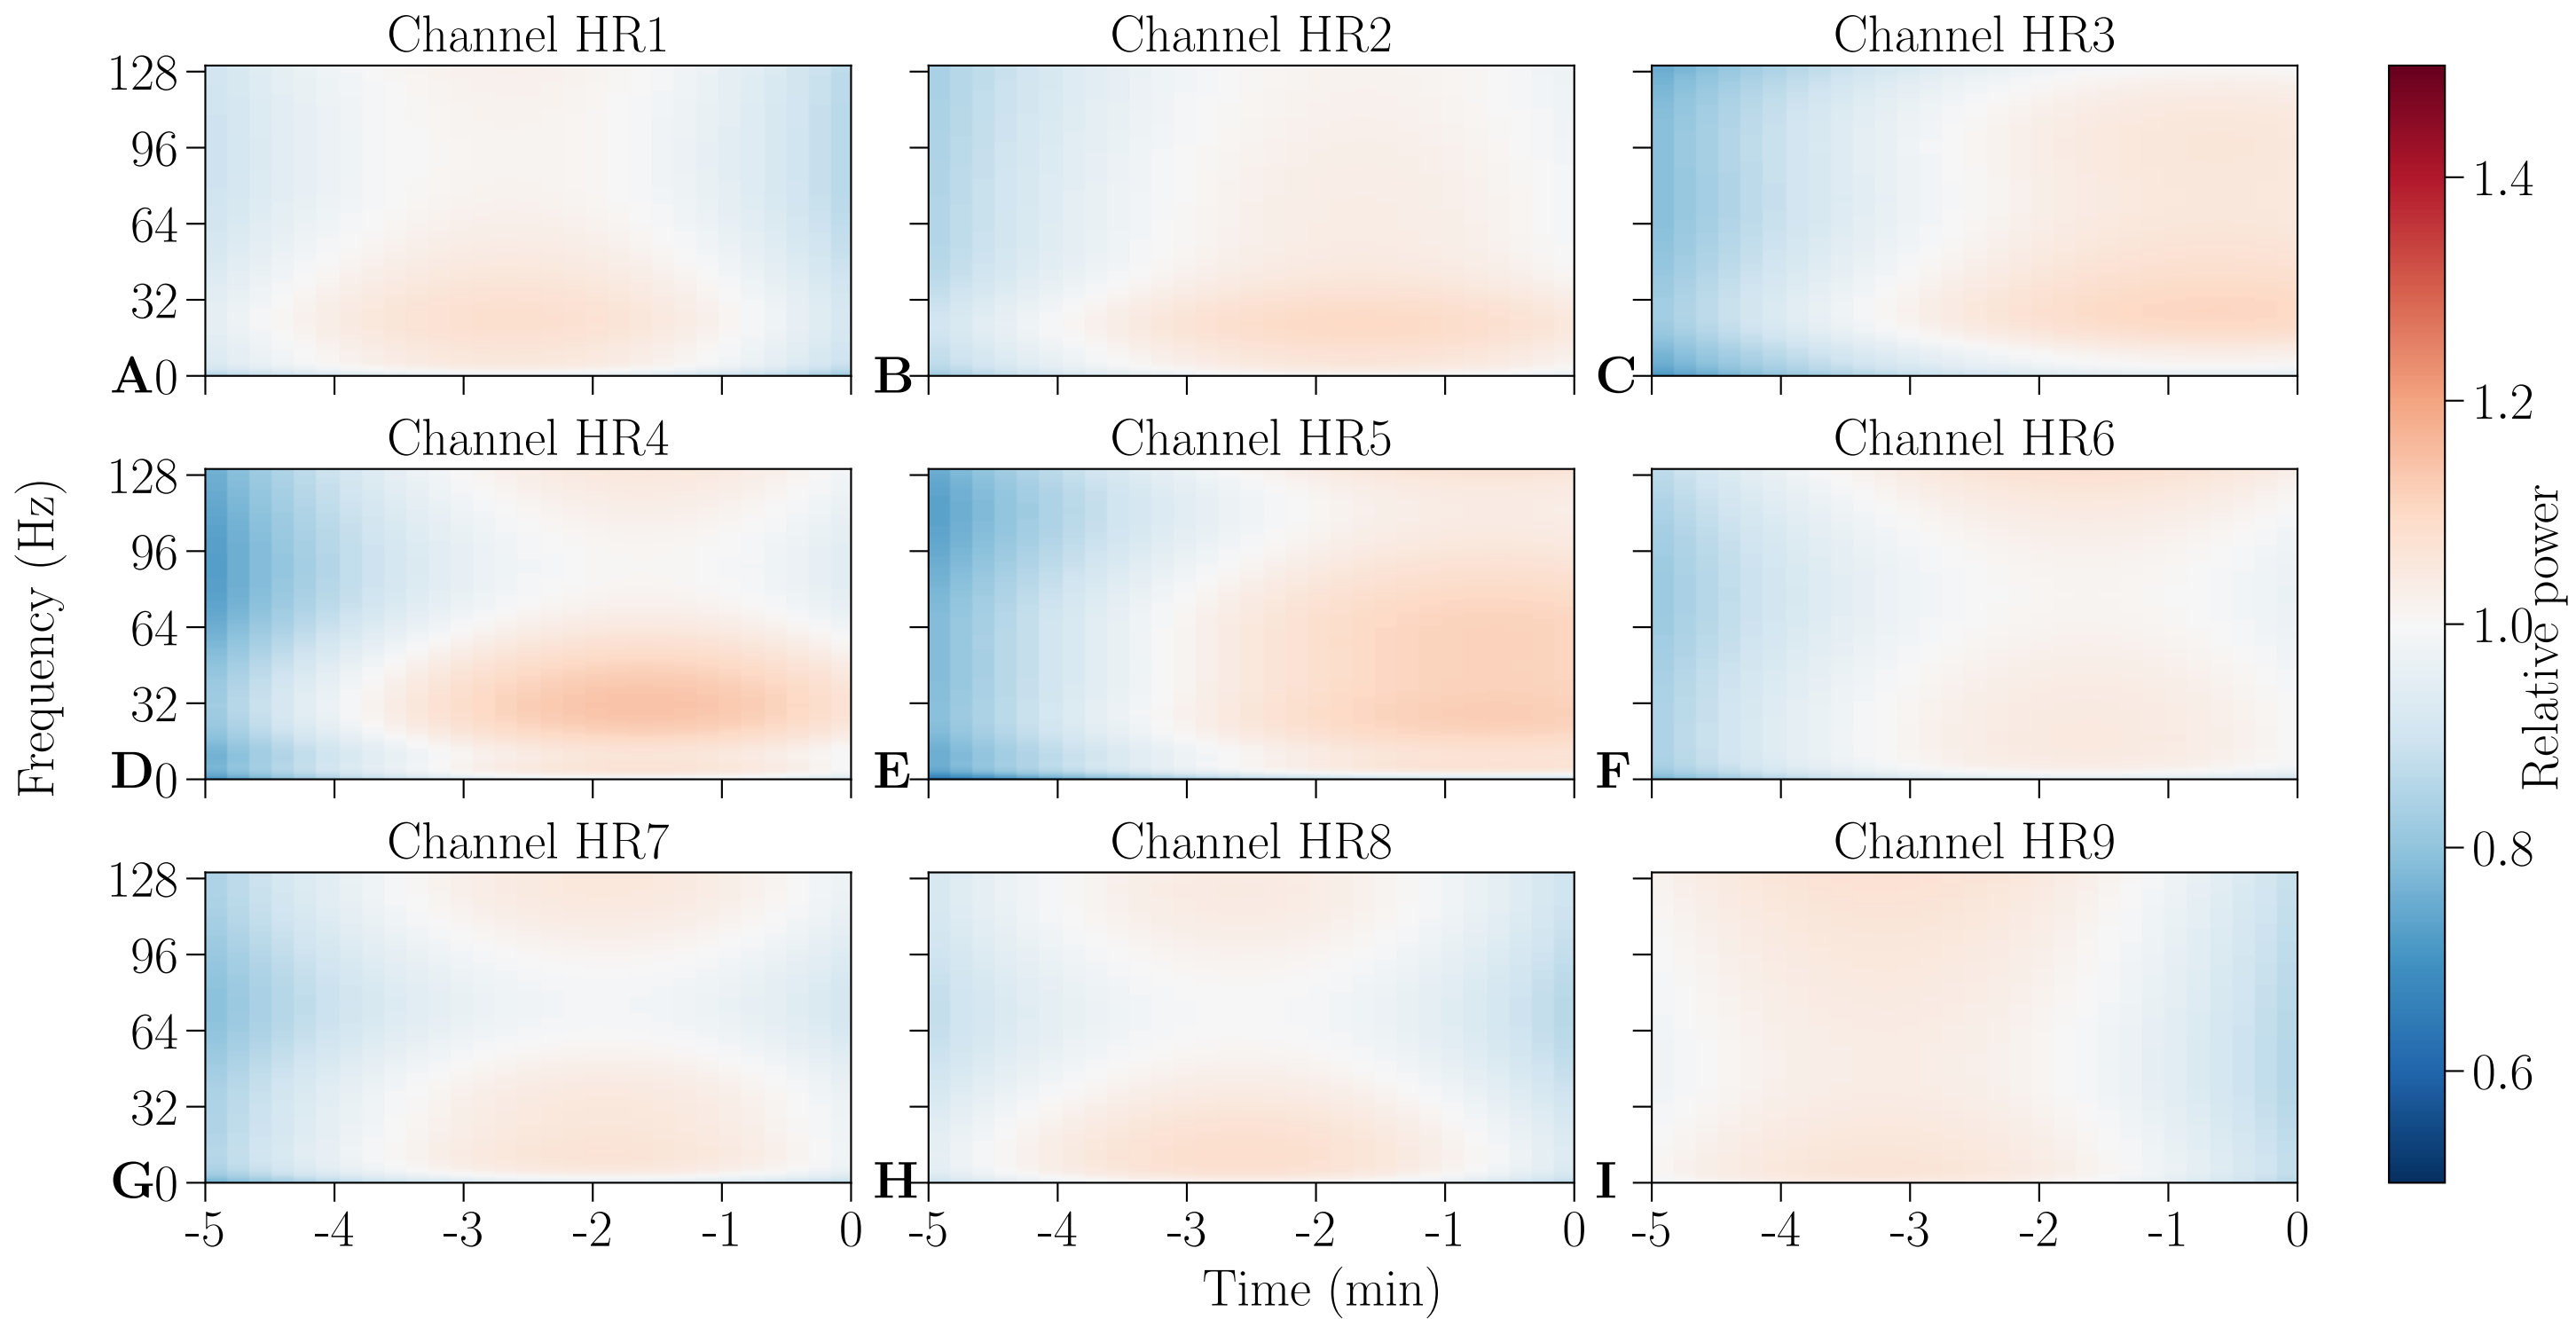

Supplement: Supplementary file [file 19000430-3.pdf]
